# Supplementary material for: Moderate positive predictive value of a multiplex real-time PCR on whole blood for pathogen detection in critically ill patients with sepsis
Source: Springer Nature journal article supplement (doi:10.1007/s10096-019-03616-w), 2019-06-26
Supplement: MOESM1 [file 16856418]

## ELECTRONIC SUPPLEMENTARY MATERIAL

### **Moderate positive predictive value of a multiplex real-time PCR on whole blood for pathogen detection in critically ill patients with sepsis**

Kirsten van de Groep, Martine P. Bos, Meri R.J. Varkila, Paul H.M. Savelkoul, David S.Y. Ong, Lennie P.G. Derde, Nicole P. Juffermans, Tom van der Poll, Marc J.M. Bonten, Olaf L. Cremer, *on behalf of the MARS consortium.*

#### **Content:**

Appendix I. Template of case vignette used for expert panel

**APPENDIX I. Template of case vignette used for expert panel**

| <b>CASE VIGNETTE CLINICAL VALIDATION BSI-PCR</b>                                                                                                                                                                                                                                                                                                                                                                                                                                                                                                                                                                                                                                                                                                                                                                               |                                          |                                            |                         |
|--------------------------------------------------------------------------------------------------------------------------------------------------------------------------------------------------------------------------------------------------------------------------------------------------------------------------------------------------------------------------------------------------------------------------------------------------------------------------------------------------------------------------------------------------------------------------------------------------------------------------------------------------------------------------------------------------------------------------------------------------------------------------------------------------------------------------------|------------------------------------------|--------------------------------------------|-------------------------|
| <b>Initials reviewer:</b>                                                                                                                                                                                                                                                                                                                                                                                                                                                                                                                                                                                                                                                                                                                                                                                                      |                                          |                                            |                         |
| <b>Patient_TK</b>                                                                                                                                                                                                                                                                                                                                                                                                                                                                                                                                                                                                                                                                                                                                                                                                              |                                          | <b>Date sepsis</b>                         |                         |
| <b>Hospital admission date</b><br><b>ICU admission date</b>                                                                                                                                                                                                                                                                                                                                                                                                                                                                                                                                                                                                                                                                                                                                                                    |                                          | <b>Date PCR sample</b>                     |                         |
| <b>Clinical summary:</b>                                                                                                                                                                                                                                                                                                                                                                                                                                                                                                                                                                                                                                                                                                                                                                                                       |                                          |                                            |                         |
| <p>X-year-old female. Hospital admission on DATE, because of an ischemic CVA. Recovery complicated by two times pneumosepsis with two consequent ICU-admissions. During first ICU admission <i>E. coli</i> in sputum culture and treatment with cefotaxime. DATE again fever, sputum, leucocytes 19, sputum culture positive with <i>S. aureus</i>. On DATE re-admission to the ICU with pneumosepsis and septic shock, antimicrobial treatment initiated. Differential diagnosis re-activation of Crohn disease, but ruled out on CT-abdomen (signs of stenosis, but no evident new pathology).</p> <p><u>Relevant medical history:</u><br/>Crohn disease.</p> <p><u>Antimicrobial treatment:</u><br/>DATE: empiric metronidazol/vancomycin/gentamycin<br/>DATE: de-escalation based on culture results to flucloxacillin</p> |                                          |                                            |                         |
| <b>Relevant culture results</b>                                                                                                                                                                                                                                                                                                                                                                                                                                                                                                                                                                                                                                                                                                                                                                                                |                                          |                                            |                         |
| SC 23/1                                                                                                                                                                                                                                                                                                                                                                                                                                                                                                                                                                                                                                                                                                                                                                                                                        | E. coli                                  |                                            |                         |
| SC 28/3                                                                                                                                                                                                                                                                                                                                                                                                                                                                                                                                                                                                                                                                                                                                                                                                                        | S. aureus (+++)                          |                                            |                         |
| SC 2/3                                                                                                                                                                                                                                                                                                                                                                                                                                                                                                                                                                                                                                                                                                                                                                                                                         | S. aureus (++) ; C. krusei ; throatflora |                                            |                         |
| UC 2/3                                                                                                                                                                                                                                                                                                                                                                                                                                                                                                                                                                                                                                                                                                                                                                                                                         | C. krusei                                |                                            |                         |
| BC 2/3                                                                                                                                                                                                                                                                                                                                                                                                                                                                                                                                                                                                                                                                                                                                                                                                                         | S. epidermidis (1 out of 2 sets)         |                                            |                         |
| BC 1/3 & 28/2                                                                                                                                                                                                                                                                                                                                                                                                                                                                                                                                                                                                                                                                                                                                                                                                                  | Negative                                 |                                            |                         |
| <b>MARS classification</b>                                                                                                                                                                                                                                                                                                                                                                                                                                                                                                                                                                                                                                                                                                                                                                                                     |                                          |                                            |                         |
| <u>Primary Site</u>                                                                                                                                                                                                                                                                                                                                                                                                                                                                                                                                                                                                                                                                                                                                                                                                            | HAP (probable)                           | <u>Secondary Site</u>                      | Sec. peritonitis (none) |
| Pathogens:                                                                                                                                                                                                                                                                                                                                                                                                                                                                                                                                                                                                                                                                                                                                                                                                                     | S. aureus                                |                                            | -                       |
| <b>PCR-results</b>                                                                                                                                                                                                                                                                                                                                                                                                                                                                                                                                                                                                                                                                                                                                                                                                             |                                          |                                            | <b>REVIEWER:</b>        |
| <i>P. aeruginosa</i>                                                                                                                                                                                                                                                                                                                                                                                                                                                                                                                                                                                                                                                                                                                                                                                                           | (Ct 40)                                  | <b>Classification PCR-result (TP/FP/?)</b> |                         |
| <i>S. pneumoniae</i>                                                                                                                                                                                                                                                                                                                                                                                                                                                                                                                                                                                                                                                                                                                                                                                                           | (Ct 40)                                  | <b>Classification PCR-result (TP/FP/?)</b> |                         |
| <b>Short comment reviewer:</b>                                                                                                                                                                                                                                                                                                                                                                                                                                                                                                                                                                                                                                                                                                                                                                                                 |                                          |                                            |                         |
|                                                                                                                                                                                                                                                                                                                                                                                                                                                                                                                                                                                                                                                                                                                                                                                                                                |                                          |                                            |                         |
